# Supplementary material for: New bis-pyrazolate zinc(ii) complexes as potential anticancer drugs: from structure to anticancer activity
Source: Royal Society of Chemistry journal article supplement (doi:10.1039/d5nj00043b), 2025-01-01
Supplement: d5nj00043b1.pdf [file d5nj00043b1.pdf]

**Supplementary information**

**New bis-pyrazolate zinc(II) complexes as a potential anticancer drugs:  
from structure to anticancer activity**

**Rušid Hasić<sup>a</sup>, Majda Kolenović Serezlić<sup>a</sup>, Angelina Caković<sup>b</sup>, Jovana Bogojeski<sup>b</sup>,  
Danijela Nikodijević<sup>b</sup>, Milena Milutinović<sup>b</sup>, Aleksandra Stanojević<sup>c</sup>, Milena Čavić<sup>c</sup>,  
Andrei V. Egorov<sup>d</sup>, Andrei V. Komolkin<sup>d</sup>, Ilya V. Korniyakov<sup>d</sup>, Andreas Scheurer<sup>e</sup>,  
Ralph Puchta<sup>e,f,g,h</sup> Tanja V. Soldatović<sup>a\*</sup>**

<sup>a</sup>Department of Natural-Mathematical Sciences, State University of Novi Pazar, Vuka  
Karadžića 9, 36300 Novi Pazar, Serbia

<sup>b</sup>Faculty of Science, University of Kragujevac, Radoja Domanovića 12, 34000 Kragujevac,  
Serbia

<sup>c</sup>Institute for Oncology and Radiology of Serbia, Pasterova 14, 11000 Belgrade, Serbia

<sup>d</sup> St.Petersburg State University, 7/9 Universitetskaya nab., 199034, St.Petersburg, Russia

<sup>e</sup>Inorganic Chemistry, Department of Chemistry and Pharmacy, University of  
Erlangen-Nürnberg, Egerlandstrasse 1, 91058 Erlangen, Germany

<sup>f</sup>Staatliche Fachoberschule Nürnberg, Lothar-von-Faber-Schule, Schafhofstr. 25, 90411  
Nürnberg, Germany

<sup>g</sup>University of Erlangen-Nuremberg, Department of Chemistry and Pharmacy, Computer  
Chemistry Center, Nägelsbachstr. 25, 91052 Erlangen, Germany

<sup>h</sup>University of Erlangen-Nuremberg, Zentralinstitute for Scientific Computing (ZISC),  
Martensstr. 5a, 91058 Erlangen, Germany

\*Corresponding author:

Prof. Dr. Tanja Soldatović Phone: +381(0)20-317-754,

Fax: +381(0) 20-337-0669, e-mail: [tsoldatovic@np.ac.rs](mailto:tsoldatovic@np.ac.rs)

ORCID ID: <http://orcid.org/0000-0003-3010-6503>

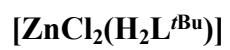

$^1\text{H}$  NMR

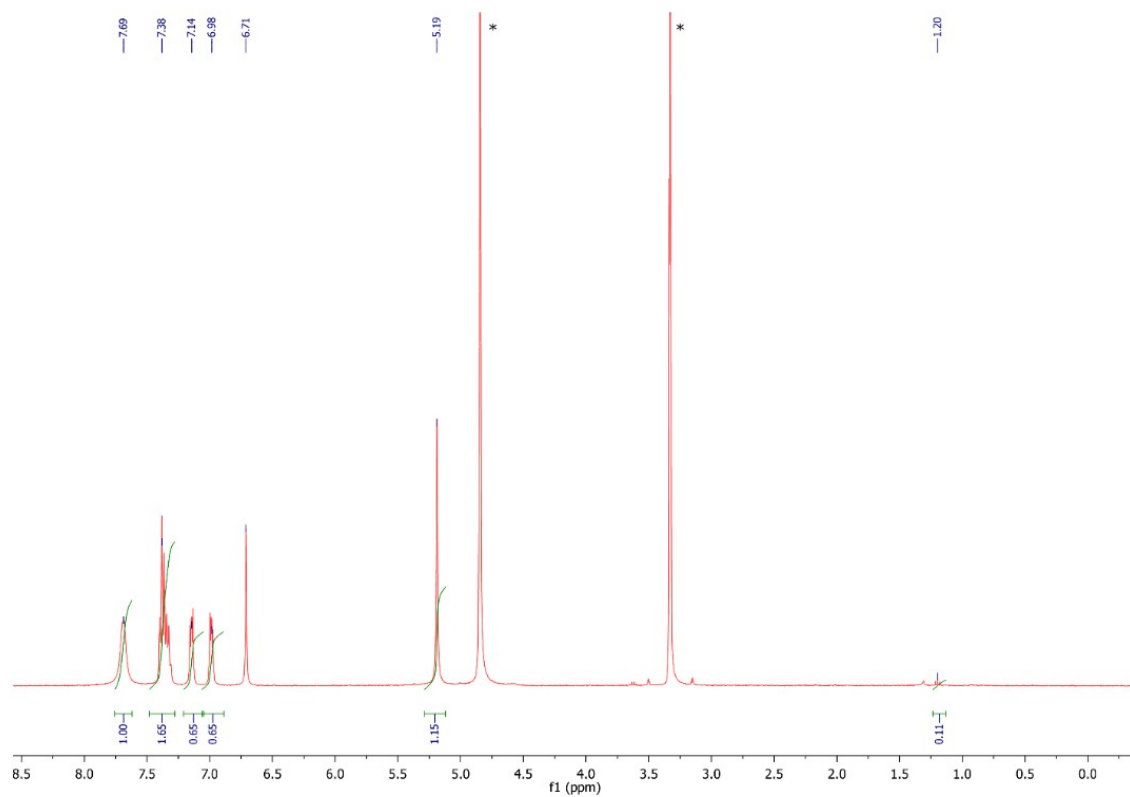

\*Peaks from the solvent MeOD

# <sup>13</sup>C NMR

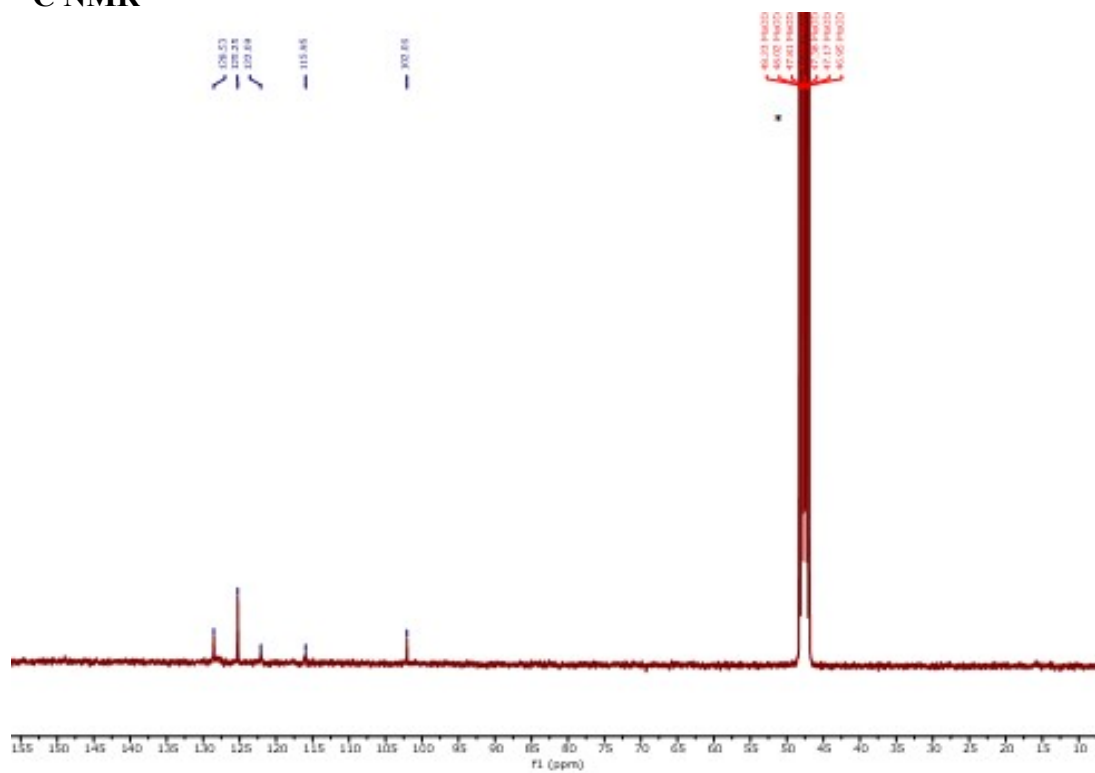

\*Peak from the solvent MeOD

# $^1\text{H}$ - $^1\text{H}$ COSY

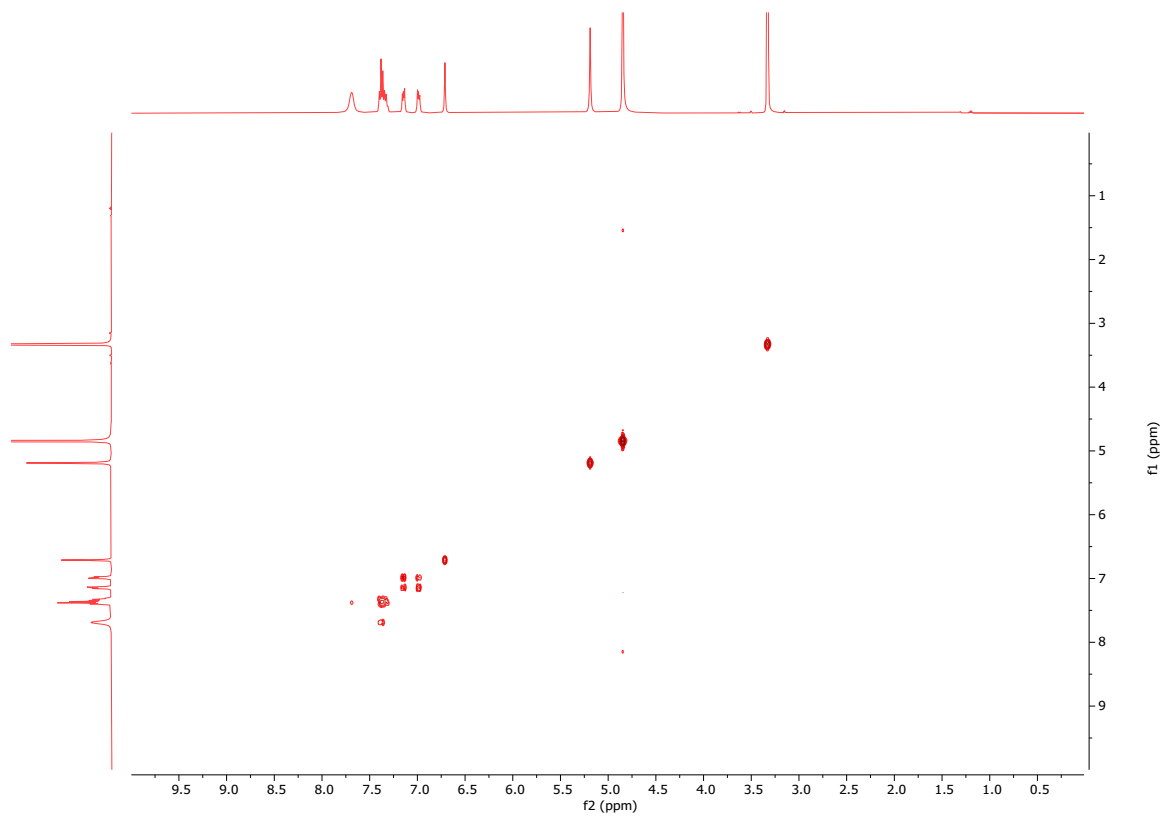

## FT-IR

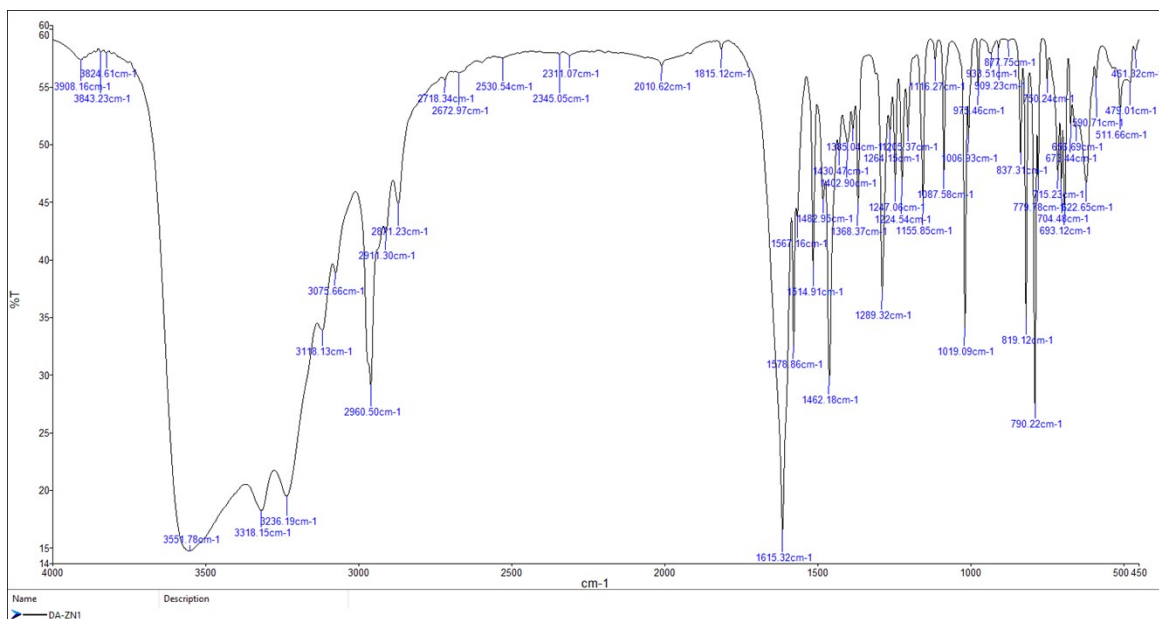

## UV-Vis

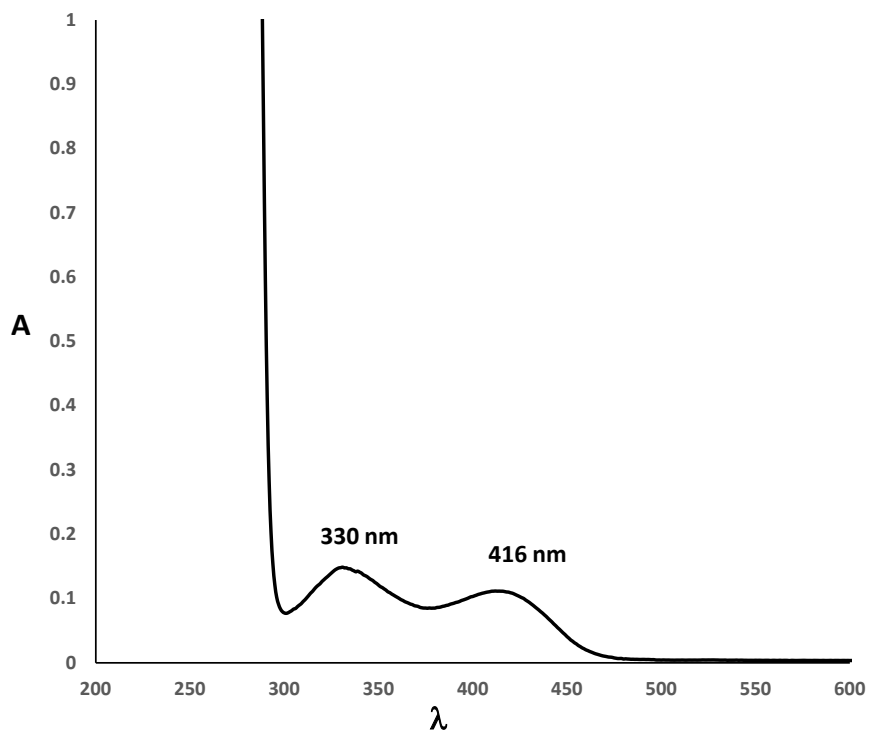

Fig. S1 Characterization spectra of  $[\text{ZnCl}_2(\text{H}_2\text{L}^{\text{tBu}})]$  complex.

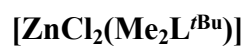

$^1\text{H}$  NMR

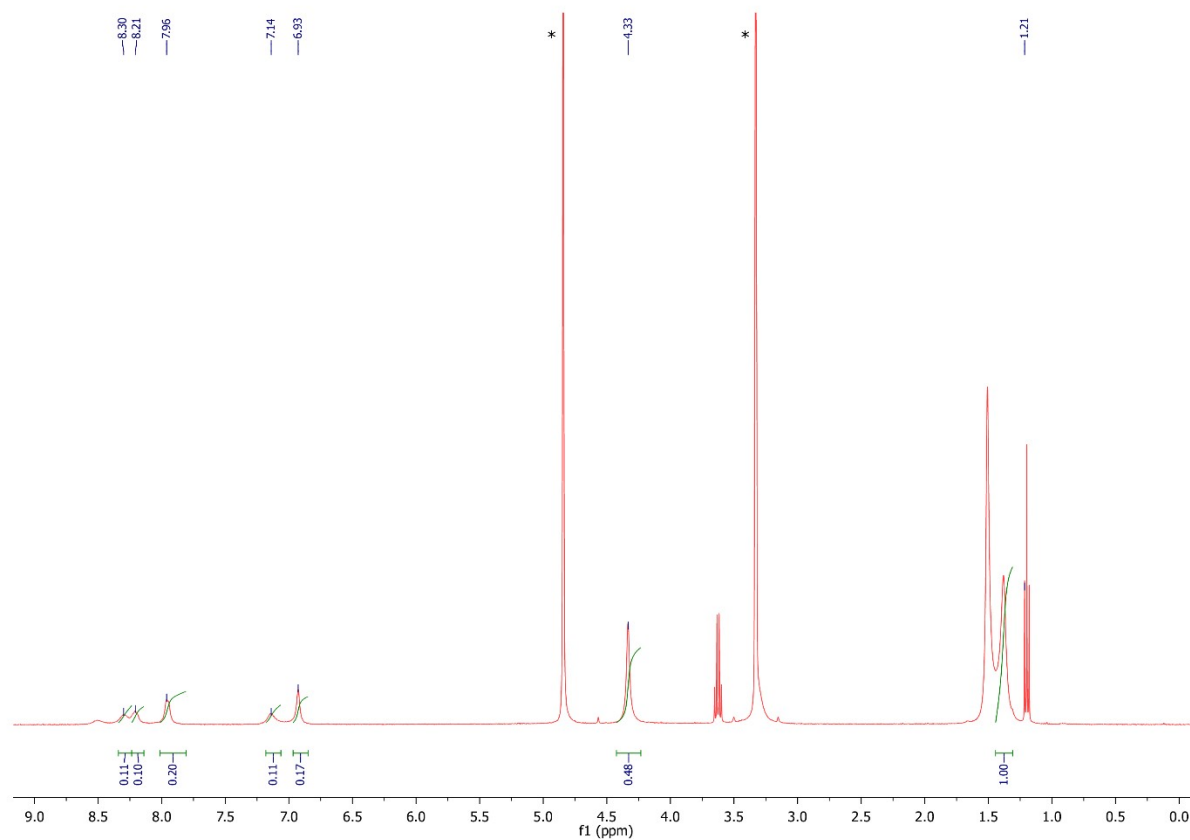

\*Peaks from the solvent MeOD

# <sup>13</sup>C NMR

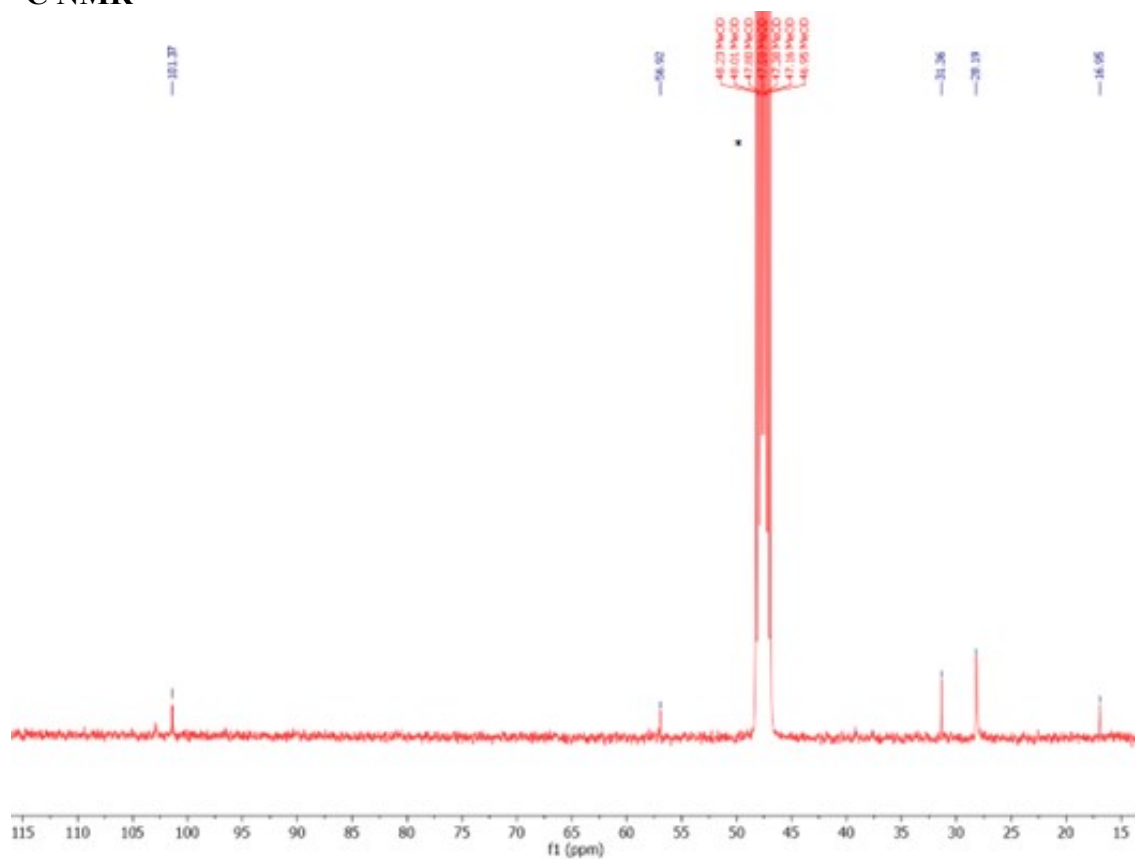

\*Peak from the solvent MeOD

# $^1\text{H}-^1\text{H}$ COSY

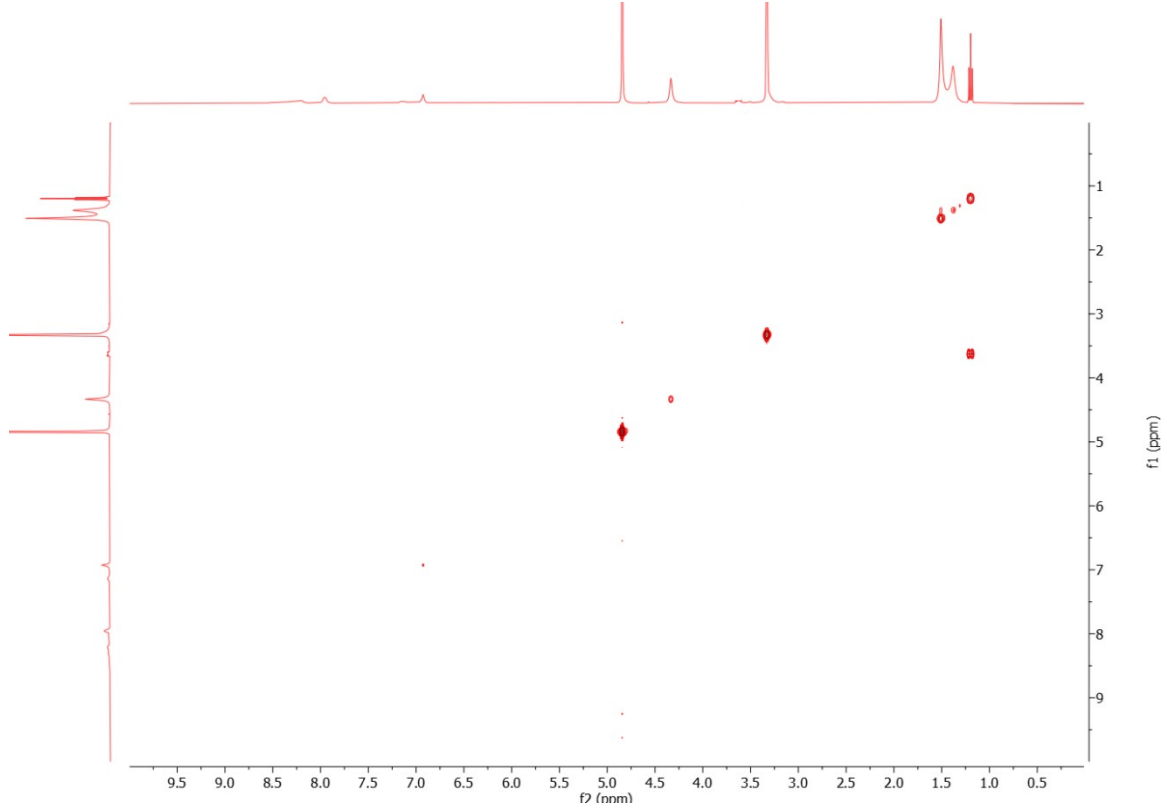

# FT-IR

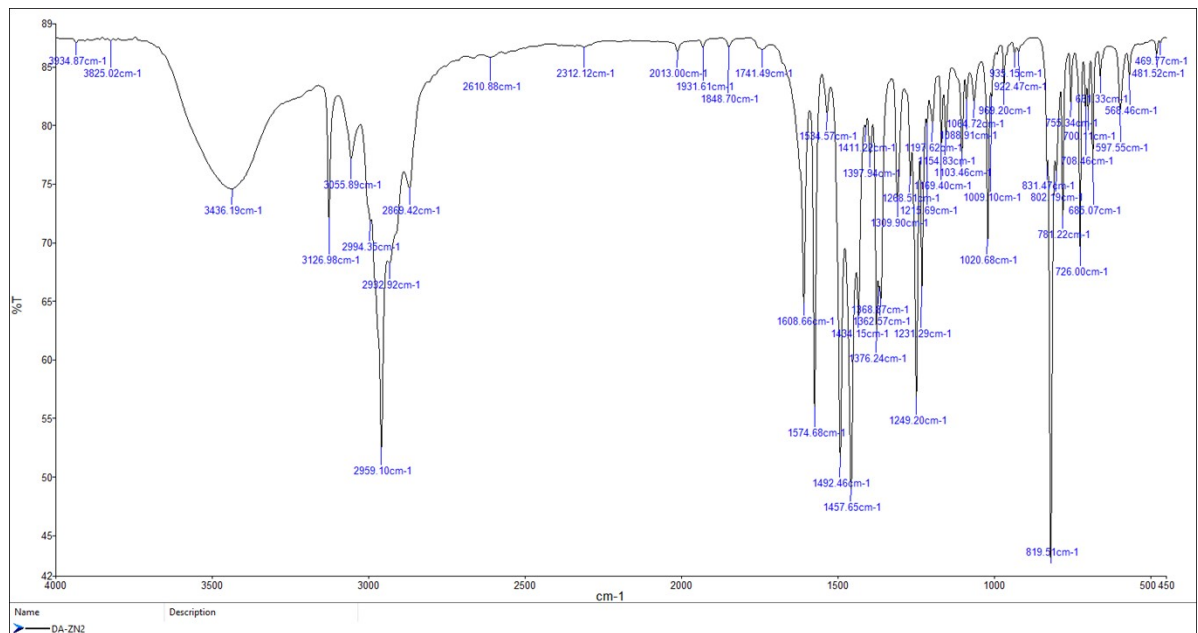

# UV-Vis



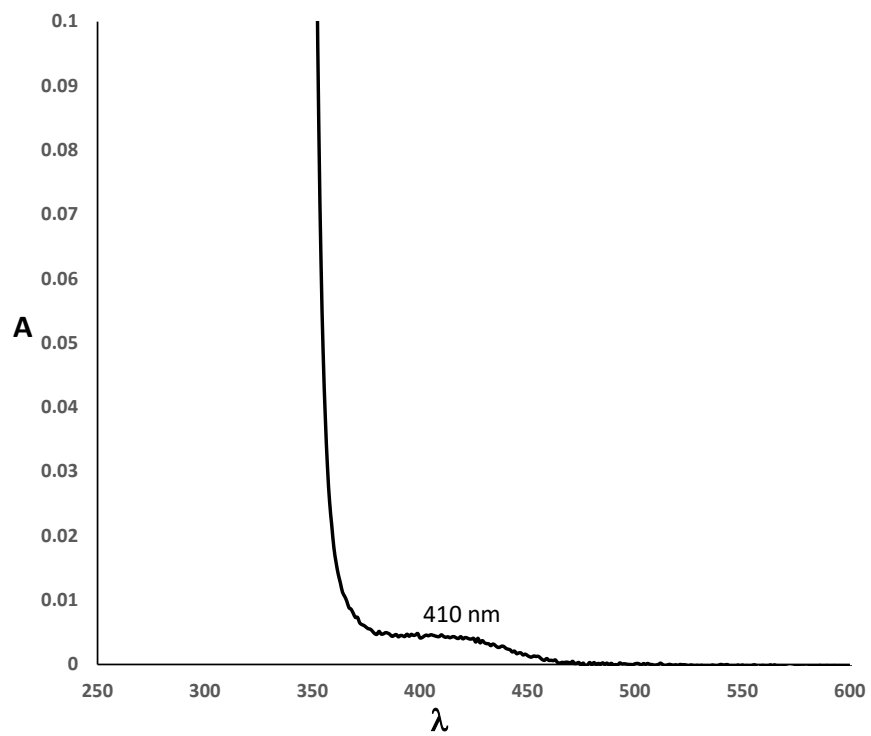

**Fig. S2** Characterization spectra of [ZnCl<sub>2</sub>(Me<sub>2</sub>L<sup>tBu</sup>)] complex.

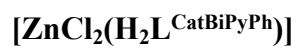

$^1\text{H}$  NMR

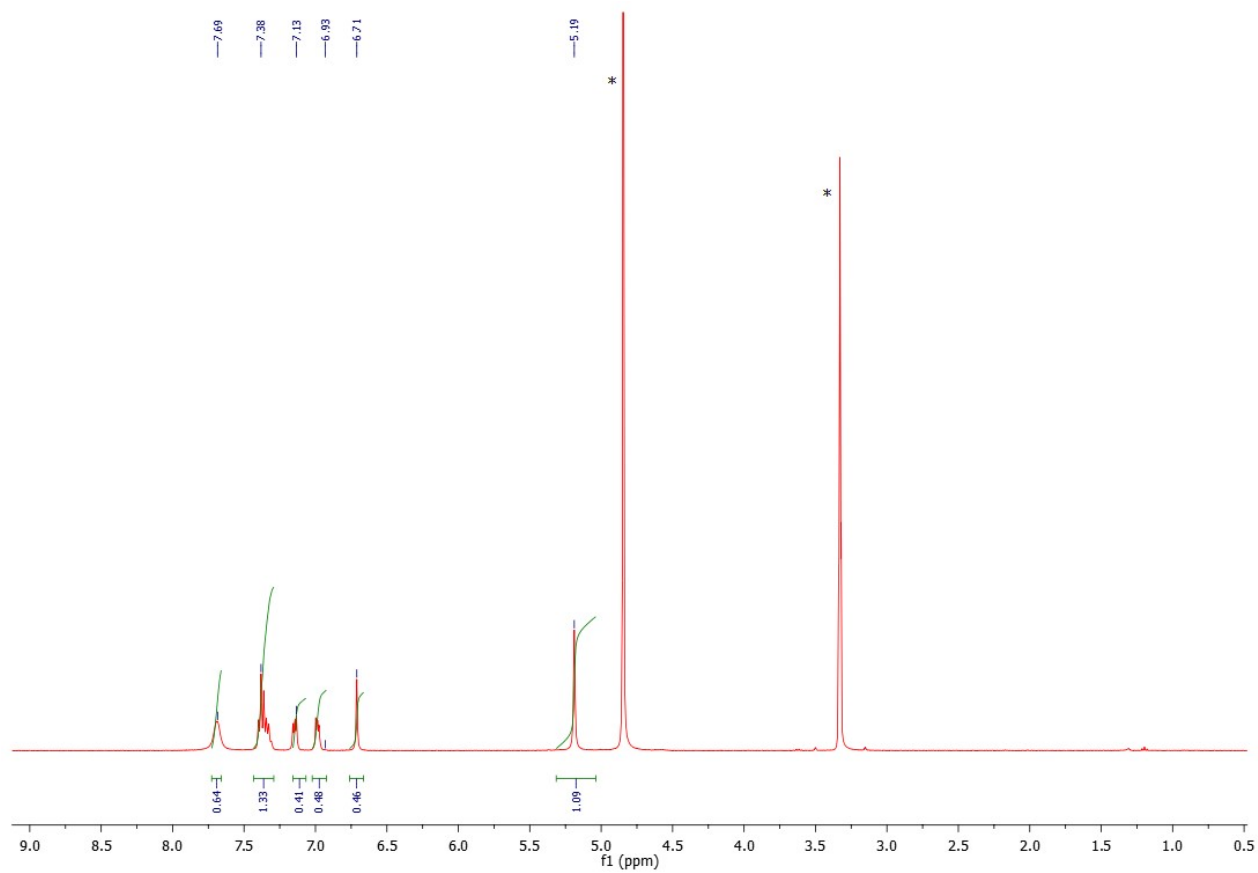

\*Peaks from the solvent MeOD

# <sup>13</sup>C NMR

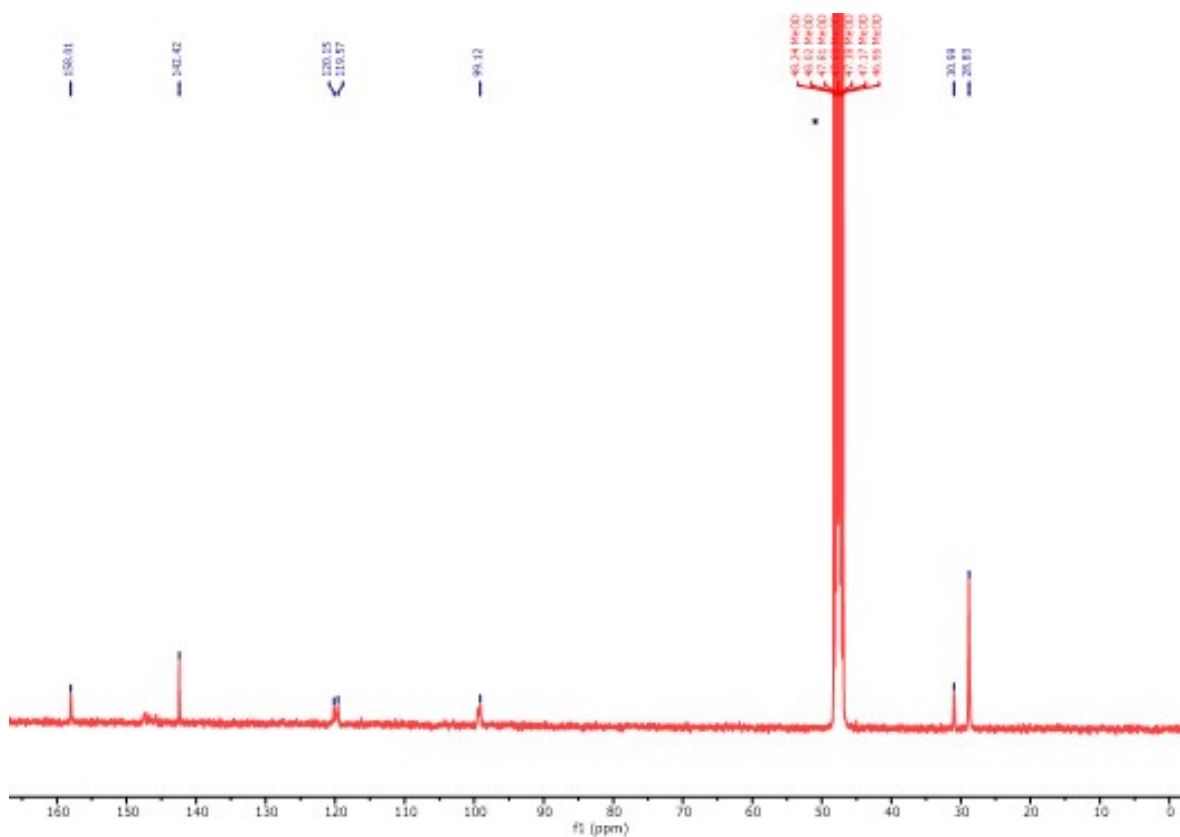

\*Peak from the solvent MeOD

# $^1\text{H}-^1\text{H}$ COSY

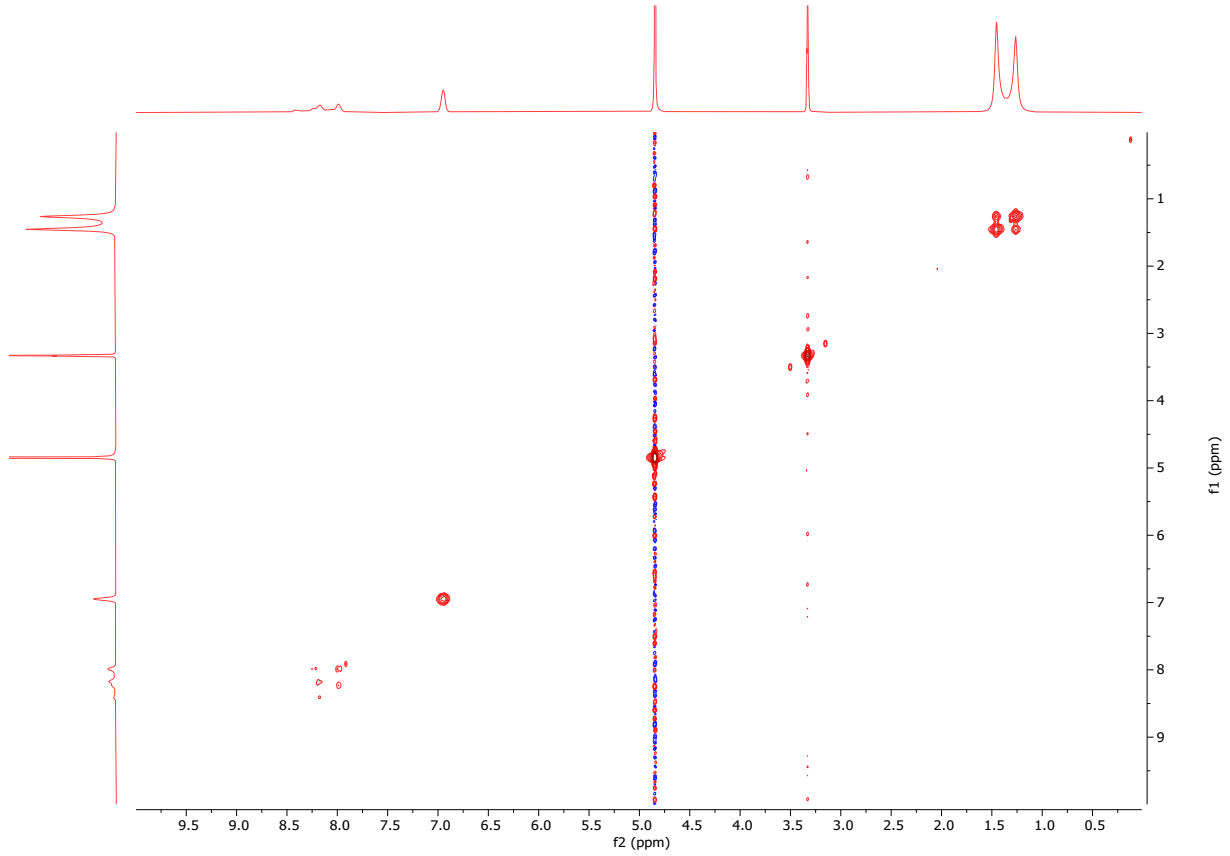

# FT-IR

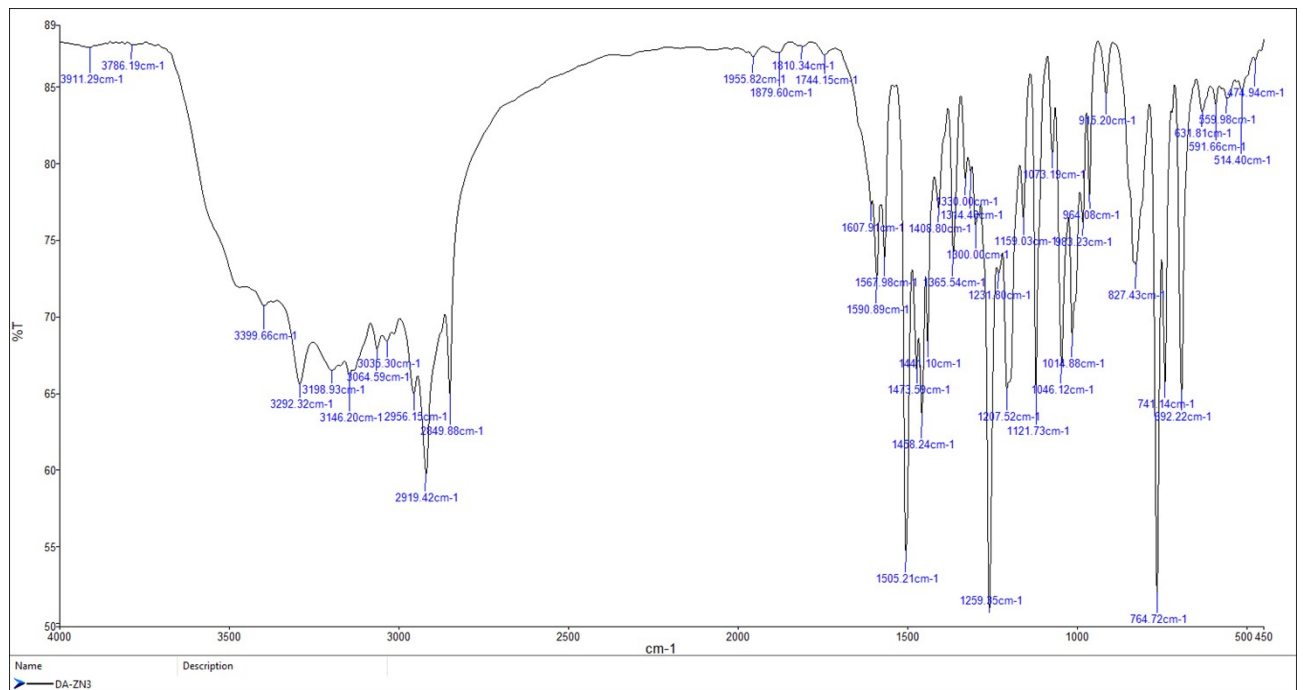

## UV-Vis

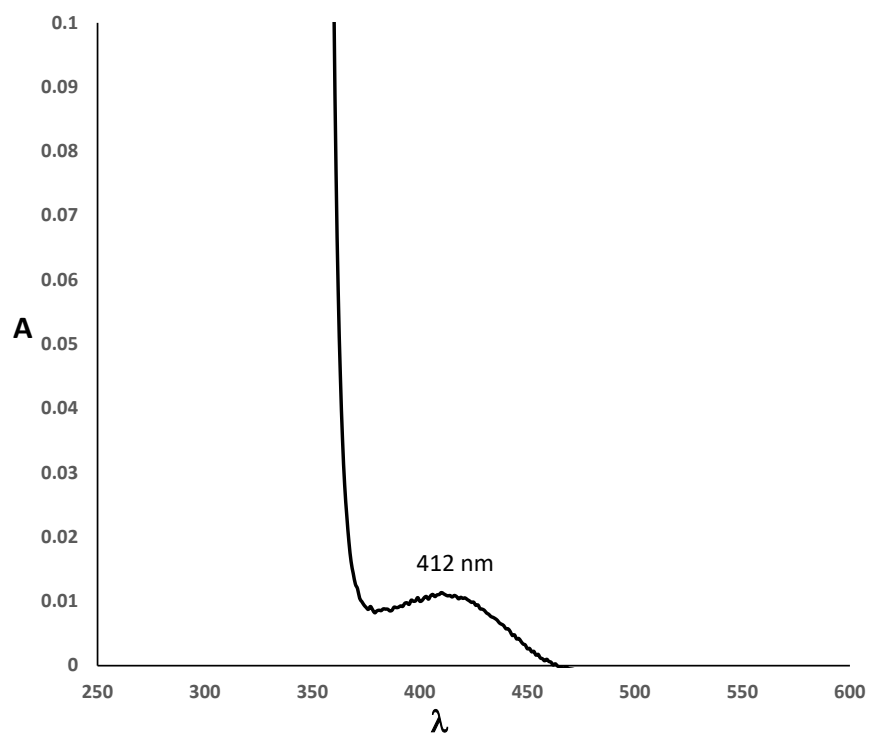

**Fig. S3** Characterization spectra of  $[\text{ZnCl}_2(\text{H}_2\text{L}^{\text{CatBiPyPh}})]$  complex.

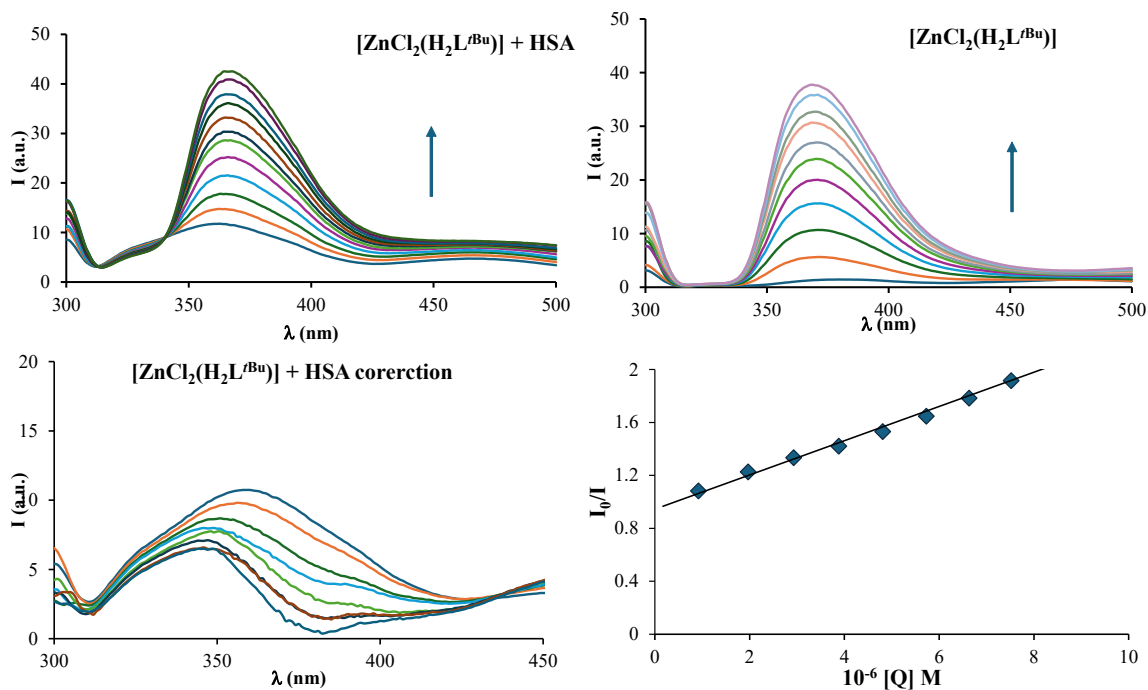

**Fig. S4** Fluorescent titration spectra of HAS (2 μM) solution in absence and presence of the examined complex  $[\text{ZnCl}_2(\text{H}_2\text{L}^{\text{tBu}})]$ . The arrow shows changes in the spectral band with the increasing complex concentration (added up to ratio 5). Insert graph: Stern-Volmer plots for HSA fluorescence titration in presents of the examined complex  $[\text{ZnCl}_2(\text{H}_2\text{L}^{\text{tBu}})]$ .

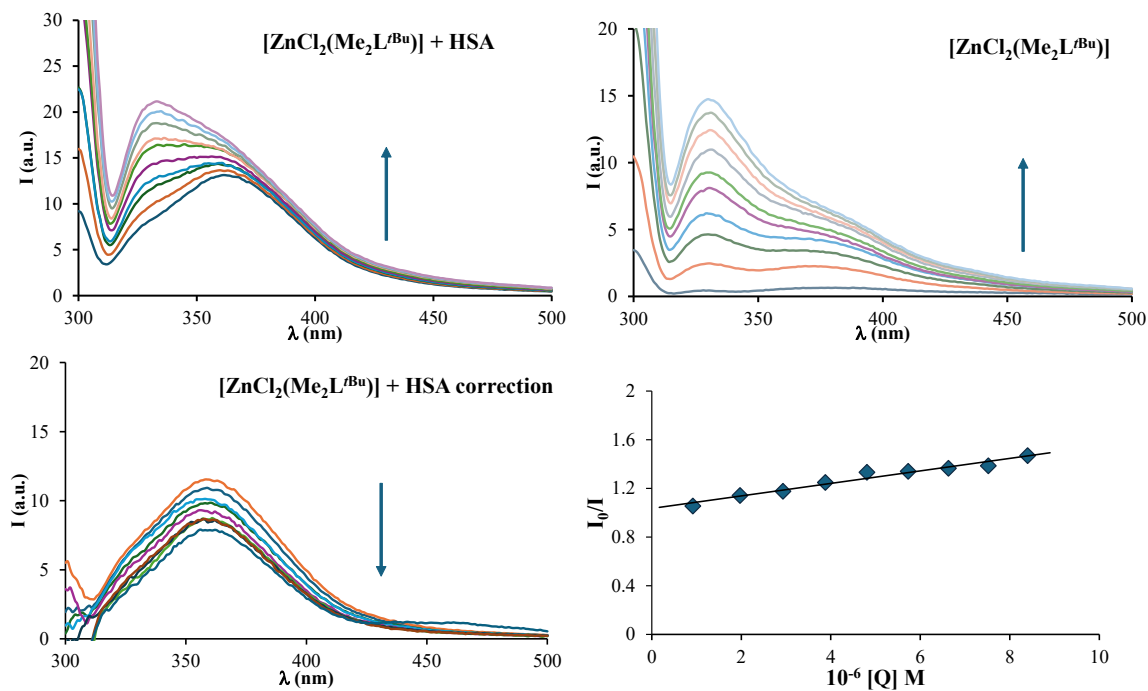

**Fig. S5** Fluorescent titration spectra of HAS (2  $\mu\text{M}$ ) solution in absence and presence of the examined complex  $[\text{ZnCl}_2(\text{Me}_2\text{L}^{\text{tBu}})]$ . The arrow shows changes in the spectral band with the increasing complex concentration (added up to ratio 5). Insert graph: Stern-Volmer plots for HSA fluorescence titration in presents of the examined complex  $[\text{ZnCl}_2(\text{Me}_2\text{L}^{\text{tBu}})]$ .
